# Supplementary material
Source: PubMed Central journal article supplement (PMC4554260)

## Supplemental Tables

### A high-throughput drug screening strategy for detecting rhodopsin P23H mutant rescue and degradation

Yuanyuan Chen<sup>1</sup>, Hong Tang<sup>2</sup>, William Seibel<sup>2,3</sup>, Ruben Papoian<sup>2,4</sup>, Xiaoyu Li<sup>1</sup>, Nevin A. Lambert<sup>5</sup>, Krzysztof Palczewski<sup>1,#</sup>

1. Department of Pharmacology, Case Western Reserve University, 2109 Euclid Ave., Cleveland, OH 44106-4965, USA
2. Drug Discovery Center, College of Medicine, University of Cincinnati, Cincinnati, OH 45237, USA
3. Current address: Oncology Department, Cincinnati Children's Hospital Medical Center, 3333 Burnet Ave., Cincinnati, OH 45229, USA
4. Current address: Department of Neurology and Rehabilitation Medicine, College of Medicine, University of Cincinnati, Cincinnati, OH 45267, USA
5. Department of Pharmacology and Toxicology, Georgia Regents University, 1459 Laney Walker Blvd., Augusta, GA 30912, USA

Supplemental Table 1. Dose-response data for 9-*cis*-retinal in the  $\beta$ -Gal fragment complementation assay plotted in Figure 2B.

| [9- <i>cis</i> -Retinal] | Log concentration | Mean RLU <sup>a</sup> | Standard deviation <sup>b</sup> |
|--------------------------|-------------------|-----------------------|---------------------------------|
| ( $\mu$ M)               | (M)               |                       |                                 |
| 20                       | -4.69897          | 1972                  | 1272                            |
| 15                       | -4.82391          | 6587                  | 5479                            |
| 10                       | -5.00000          | 29038                 | 7889                            |
| 7.5                      | -5.12494          | 39254                 | 3852                            |
| 5.0                      | -5.30103          | 33956                 | 490                             |
| 2.5                      | -5.60206          | 29152                 | 1532                            |
| 1.0                      | -6.00000          | 16039                 | 1157                            |
| 0.75                     | -6.12494          | 17124                 | 2740                            |
| 0.50                     | -6.30103          | 11744                 | 777                             |
| 0.25                     | -6.60206          | 7901                  | 1096                            |
| 0.10                     | -7.00000          | 4227                  | 53                              |

|       |          |      |     |
|-------|----------|------|-----|
| 0.05  | -7.30103 | 3116 | 66  |
| 0.01  | -8.00000 | 2142 | 171 |
| 0.005 | -8.30103 | 1592 | 43  |
| 0.001 | -9.00000 | 1317 | 484 |

<sup>a</sup> Average readings of relative luminescence units from triplicate determinations

<sup>b</sup> Standard deviations of luminescence readings from triplicate determinations.

Supplemental Table 2. Dose-response data for 9-*cis*-retinal in the BRET assay plotted in Figure 3B.

| [9- <i>cis</i> -Retinal]<br>( $\mu$ M) | Log concentration<br>(M) | BRET <sup>a</sup><br>(ratio of emissions at 530 nm/480 nm) | Standard deviation |
|----------------------------------------|--------------------------|------------------------------------------------------------|--------------------|
| 20                                     | -4.699                   | 0.853                                                      | 0.003              |
| 10                                     | -5.000                   | 0.843                                                      | 0.004              |
| 2.5                                    | -5.6021                  | 0.814                                                      | 0.011              |
| 1.3                                    | -5.9031                  | 0.804                                                      | 0.006              |
| 0.63                                   | -6.2041                  | 0.784                                                      | 0.013              |
| 0.31                                   | -6.5052                  | 0.776                                                      | 0.006              |
| 0.16                                   | -6.8062                  | 0.77                                                       | 0.013              |
| 0.078                                  | -7.1072                  | 0.766                                                      | 0.013              |
| 0.039                                  | -7.4082                  | 0.756                                                      | 0.015              |
| 0.010                                  | -8.0103                  | 0.748                                                      | 0.003              |
| 0.0050                                 | -8.3113                  | 0.738                                                      | 0.016              |
| 0.0025                                 | -8.6124                  | 0.743                                                      | 0.004              |

<sup>a</sup> Average of BRET ratio (emission ratio at 530 to 480 nm) from triplicate determinations.

Supplemental Table 3. Dose response data for 9-*cis*-retinal obtained by high-content imaging plotted in Figure 4B.

| [9- <i>cis</i> -Retinal]<br>( $\mu$ M) | Log<br>concentration<br>(M) | Mean INT ratio<br>PM-to-ER <sup>a</sup> | Std.<br>dev | Mean number<br>of nuclei | Standard<br>deviation |
|----------------------------------------|-----------------------------|-----------------------------------------|-------------|--------------------------|-----------------------|
| 20                                     | -4.699                      | 0.134                                   | 0.038       | 66                       | 12                    |
| 10                                     | -5                          | 0.479                                   | 0.000       | 400                      | 45                    |
| 5                                      | -5.301                      | 0.756                                   | 0.090       | 467                      | 375                   |
| 2.5                                    | -5.6021                     | 0.492                                   | 0.027       | 1234                     | 20                    |
| 1.25                                   | -5.9031                     | 0.390                                   | 0.010       | 2430                     | 323                   |
| 0.625                                  | -6.2041                     | 0.381                                   | 0.028       | 2426                     | 69                    |
| 0.3125                                 | -6.5051                     | 0.459                                   | 0.032       | 3474                     | 662                   |
| 0.15625                                | -6.8062                     | 0.443                                   | 0.011       | 3020                     | 532                   |

<sup>a</sup> Means of triplicate determinations, each representing the averaged intensity ratio per cell of P23H staining on the PM region to that in the ER region.

Supplemental Table 4. Measurements of band intensities from immunoblots plotted in Figure 5B.

|                             |       | P23H mutant opsin                         |                    | WT                           |                    | P23H mutant opsin                                                       |                    |
|-----------------------------|-------|-------------------------------------------|--------------------|------------------------------|--------------------|-------------------------------------------------------------------------|--------------------|
| Treatment                   |       | Mean of normalized total INT <sup>a</sup> | Standard deviation | Mean of normalized total INT | Standard deviation | Mean INT ratio of mature glycosylated opsin to total opsin <sup>b</sup> | Standard deviation |
| DMSO                        | 0.1%  | 1.000                                     | 0.076              | 1.000                        | 0.002              | 0.091                                                                   | 0.041              |
| None <sup>c</sup>           |       | 0.595                                     | 0.151              | 0.971                        | 0.263              | 0.102                                                                   | 0.075              |
| 9- <i>cis</i> -Retinal (μM) | 20    | 0.833                                     | 0.265              | 1.874                        | 0.153              | 0.762                                                                   | 0.009              |
|                             | 10    | 4.548                                     | 0.088              | 2.373                        | 0.093              | 0.870                                                                   | 0.034              |
|                             | 5     | 4.524                                     | 0.105              | 3.200                        | 0.007              | 0.910                                                                   | 0.016              |
|                             | 2.5   | 3.190                                     | 0.025              | 3.347                        | 0.069              | 0.888                                                                   | 0.038              |
|                             | 1.25  | 2.857                                     | 0.041              | 2.679                        | 0.141              | 0.747                                                                   | 0.007              |
|                             | 0.625 | 1.286                                     | 0.228              | 2.962                        | 0.126              | 0.399                                                                   | 0.020              |

<sup>a</sup> The averaged total intensities of immunoblots from 2 individual treatments of P23H mutant opsin normalized by immunoblot intensities of β-tubulin.

<sup>b</sup> The averaged immunoblot intensity ratios of P23H mutant opsin with mature glycosylation to total P23H mutant opsin  $(INT_{band1}+INT_{band3})/(INT_{band1}+INT_{band2}+INT_{band3}+INT_{band4})$ , measured from triplicate samples.

<sup>c</sup> None, no treatment.



Supplemental Table 5. Dose-response data for Evans Blue in the RLuc reporter assay plotted in Figure 6B.

| [Evans Blue] <sup>a</sup><br>( $\mu$ M) | Log concentration<br>(M) | Mean RLU <sup>b</sup> | Standard deviation |
|-----------------------------------------|--------------------------|-----------------------|--------------------|
| 2.5                                     | -5.60206                 | 11613                 | 155                |
| 5                                       | -5.30103                 | 10528                 | 126                |
| 10                                      | -5.00000                 | 8668                  | 202                |
| 25                                      | -4.60206                 | 5568                  | 312                |
| 50                                      | -4.30103                 | 4309                  | 648                |
| 75                                      | -4.12494                 | 3750                  | 475                |
| 100                                     | -4.00000                 | 3561                  | 517                |
| 150                                     | -3.82391                 | 2958                  | 694                |
| 200                                     | -3.69897                 | 1989                  | 266                |
| 0                                       | N/A                      | 9749                  | 82                 |

<sup>a</sup> Readings from the 0  $\mu$ M Evans Blue samples treated with 0.1% DMSO are not plotted in the dose-response curve;

<sup>b</sup> Average relative luminescence units read from experiments performed in triplicate.

Supplemental Table 6. Standard curve data from the ALPHA assay plotted in Figure 8A.

| Bovine opsin (pg) | Mean ALPHA signal <sup>a</sup> | Standard deviation |
|-------------------|--------------------------------|--------------------|
| 0.0075            | 2450                           | 2584               |
| 0.025             | 3113                           | 2679               |
| 0.075             | 4556                           | 2916               |
| 0.25              | 6558                           | 2900               |
| 0.75              | 9150                           | 3303               |
| 2.5               | 15158                          | 8363               |
| 7.5               | 20868                          | 2906               |
| 25                | 48042                          | 4092               |
| 75                | 72810                          | 2239               |
| 250               | 117416                         | 7986               |

<sup>a</sup> Average of ALPHA signals from 3 experiments.

Supplemental Table 7. Data from the ALPHA immunoassay used to calculate the P23H mutant opsin amounts plotted in Figure 8B.

| Amount of cell lysate (%) | Mean ALPHA signal | Standard deviation | Mean calculated P23H mutant opsin amount <sup>a</sup> (pg) | Standard deviation (pg) |
|---------------------------|-------------------|--------------------|------------------------------------------------------------|-------------------------|
| 100                       | 83976             | 7919               | 101.6                                                      | 20.8                    |
| 75                        | 79321             | 2737               | 88.2                                                       | 7.4                     |
| 50                        | 60254             | 5255               | 47.2                                                       | 9.0                     |
| 25                        | 29082             | 6522               | 10.8                                                       | 4.7                     |

<sup>a</sup> Average of calculated P23H mutant opsin amounts calibrated by the standard curve plotted in Figure 8A and derived from experiments performed in triplicate.

Supplementary Figure 1. Illustration of image-based analysis for subcellular localization of P23H opsin. Here the immunostained image of DMSO treated NIH3T3 cells expressing P23H opsin was used to demonstrate the individual steps involved in image-based analysis. **(A)** Overlay of 3 channels in an image field. Yellow, opsin; green, GFP; blue, DAPI. **(B)** Nuclei defined by DAPI staining. The boundary of each nucleus was defined as the 50% line of the cell. **(C)** Cytoplasm defined by GFP fluorescence. The boundary of GFP fluorescence in each cell was defined as the 0% line of the cell. Only cells with intact cytoplasmic images were selected in the population for this image analysis. Numbers of intact cells in the 5 imaged fields of each well were recorded as the 'Cell number'. Intensity of Cy3 immunostaining of opsin with the 0% line of each cell was measured and averaged through the 5 image fields taken in each well of the 384-well plate, and the result was recorded as 'Cy3-INT-Total'. **(D)** The plasma membrane region was defined as the area between -5 (outside) to +5 % (inside) lines of each cell. Average intensity of Cy3 immunostaining of opsin within this region per cell was recorded as 'Cy3-INT-PM'. **(E)** The endoplasmic reticulum was defined as the area between the 25% and 50% lines of the cell. The average intensity of Cy3 staining of opsin within this region per cell was recorded as Cy3-INT-ER. The PM-ER INT ratio was calculated as:  $\text{Cy3-INT-PM/Cy3-INT-ER}$ .

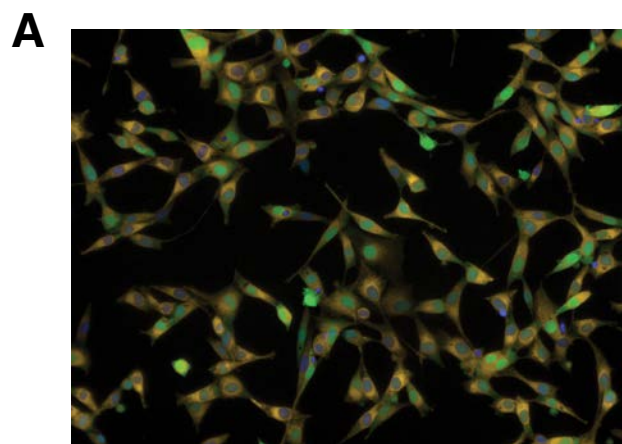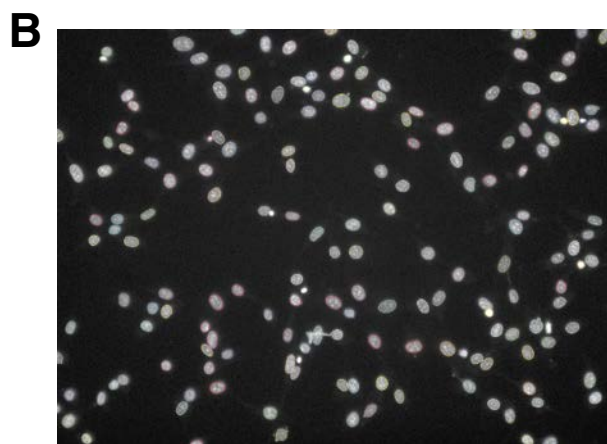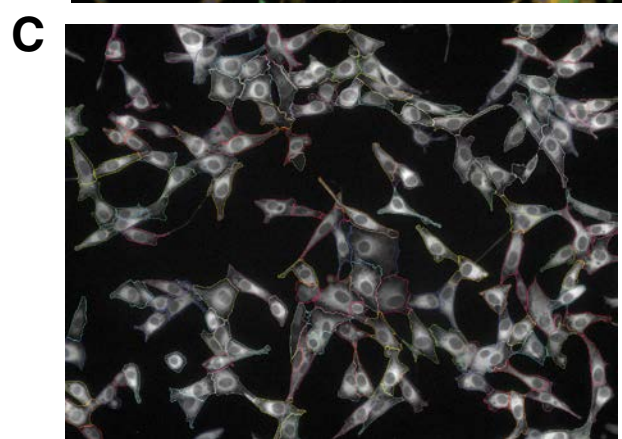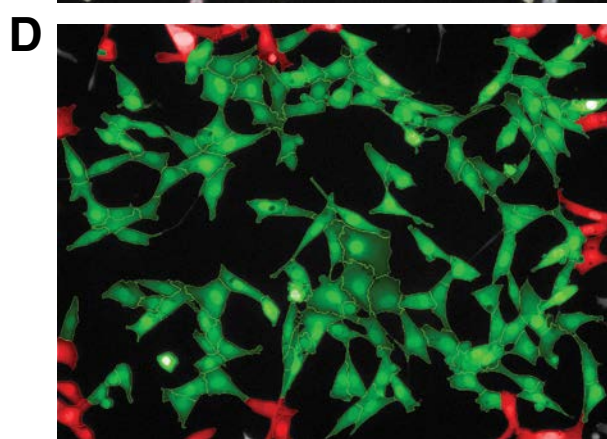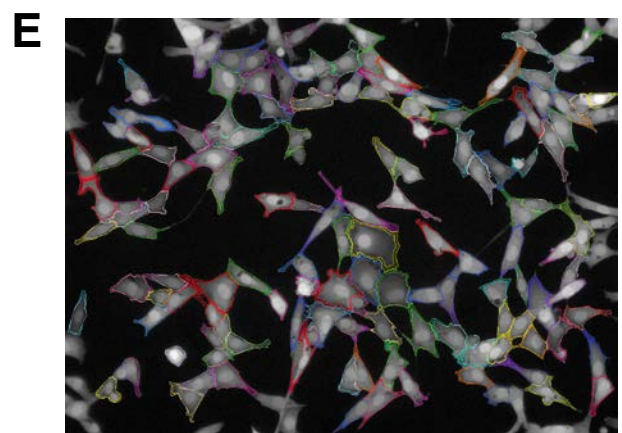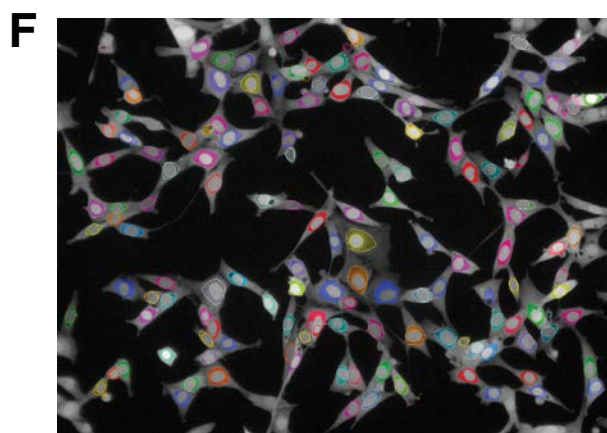

Supplementary Figure 2. WT-opsin-Rluc reporter assay for selection of compounds which specifically degrade P23H opsin but not affect the WT opsin amount. **(A)** Immunoblot of opsin from lysate of HEK293 stable cells expressing WT-opsin-Rluc (left, molecular mass of opsin monomer is 75 kDa) or P23H-opsin-Rluc (right). Bands from bottom to up are dimer and higher molecular weight oligomers of opsin-Rluc fusion proteins. Due to the difference of glycosylation between WT and P23H opsin, band sizes of the opsins are different. **(B)** Chart of luciferase activity in relationship to number of cells expressing WT-opsin-Rluc. Different number of cells (12.5, 25, 37.5, 50, 62.5, 75, 87.5, and 100%) was seeded to each well of a 384-well plate to represent proportional amount of WT-opsin. The 100% cell amount equals to 8000 cells/well. The luminescence readouts were calibrated to WT-opsin amount by sigmoidal curve fitting. Parameters of fitted curve were listed in the inset of **(B)**. This chart will be used to calculate WT-opsin amount after treatment of compounds of interest.

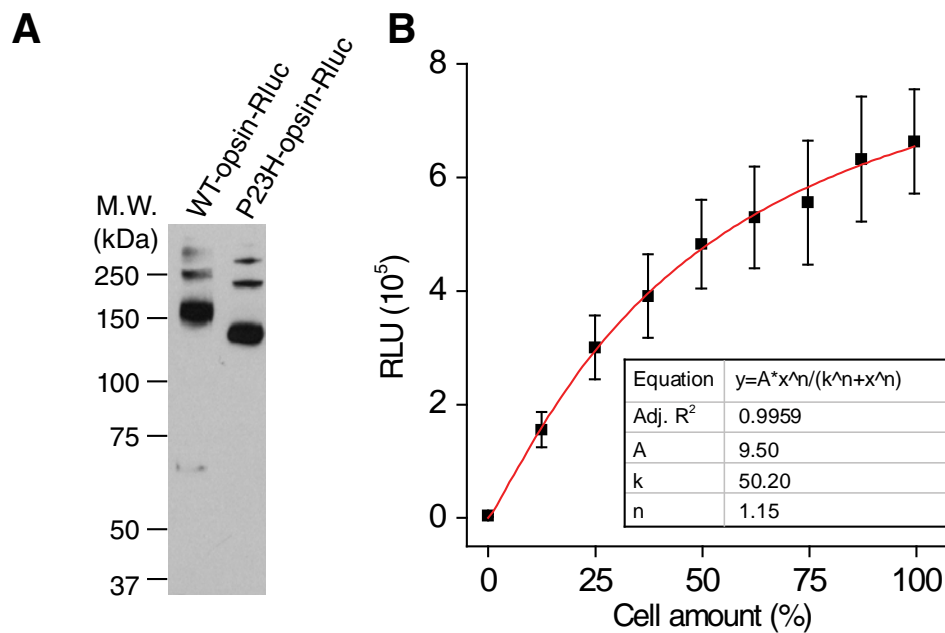

Supplement: i1552-5783-56-4-2553-s01.pdf [file i1552-5783-56-4-2553-s01.pdf]
